# Supplementary material for: Magneto-structural properties of carbonato-bridged copper(ii) complexes: fixation of atmospheric CO2
Source: Royal Society of Chemistry journal article supplement (doi:10.1039/c5nj00285k), 2015-01-01
Supplement: c5nj00285k1.pdf [file c5nj00285k1.pdf]

## Electronic Supporting Information (ESI)

### Magneto-structural properties of carbonato-bridged copper(II) complexes. Fixation of atmospheric CO<sub>2</sub>

Salah S. Massoud <sup>a,\*</sup>, Febee R. Louka <sup>a</sup>, Mustafa A. AL-Hasan <sup>a</sup>,  
Ramon Vicente <sup>b</sup>, Franz A. Mautner <sup>c,\*</sup>

**Table S1.** Possible hydrogen bonds of **2**

| D-H..A <sup>a</sup> | Symmetry of A       | D..A (Å) | D-H..A (°) |
|---------------------|---------------------|----------|------------|
| N(1)-H(1).....O(2)  | [1-x,-1/2,+y,3/2-z] | 3.221(6) | 160        |
| N(3)-H(3).....O(11) |                     | 2.914(4) | 125        |
| N(5)-H(5).....O(12) |                     | 2.947(6) | 157        |
| N(8)-H(8A)...O(11)  |                     | 3.047(6) | 139        |
| O(12)-H(90)...O(1)  | [1-x,-1/2+y,3/2-z]  | 3.229(7) | 157        |
| O(12)-H(91)...O(11) |                     | 2.707(6) | 160        |

<sup>a</sup> D = Donor, A = Acceptor

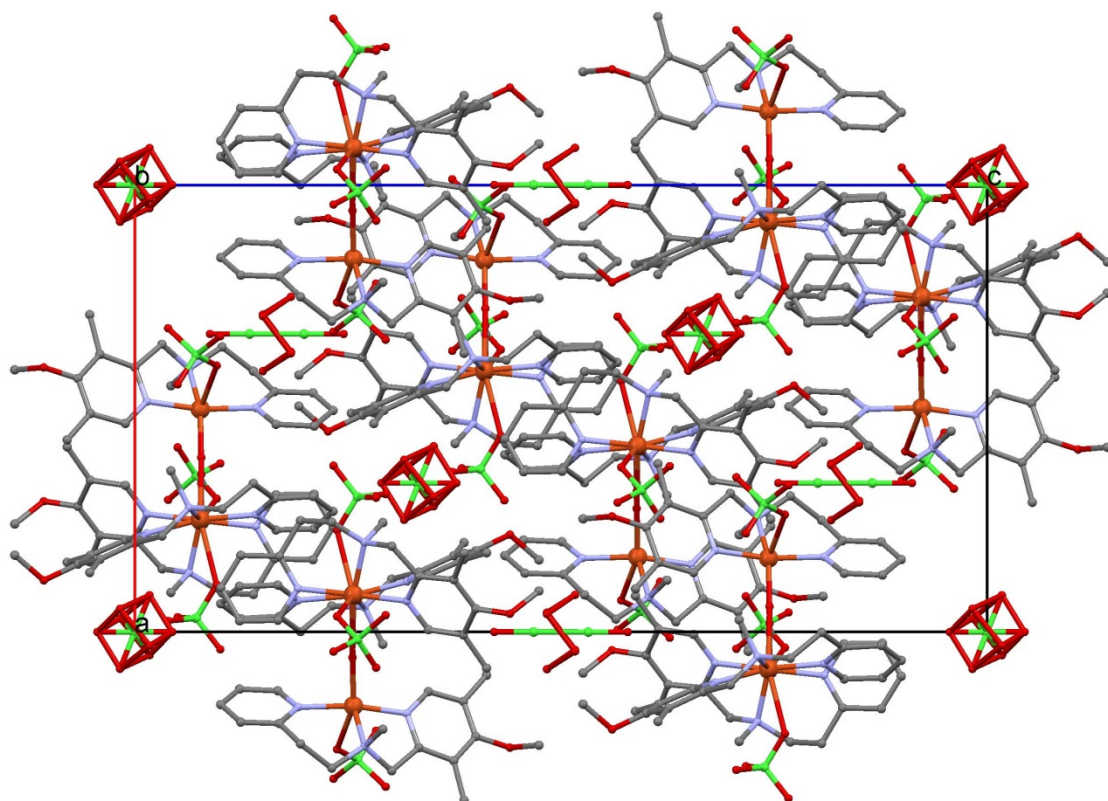

**Fig. S1.** Packing plot of 1.

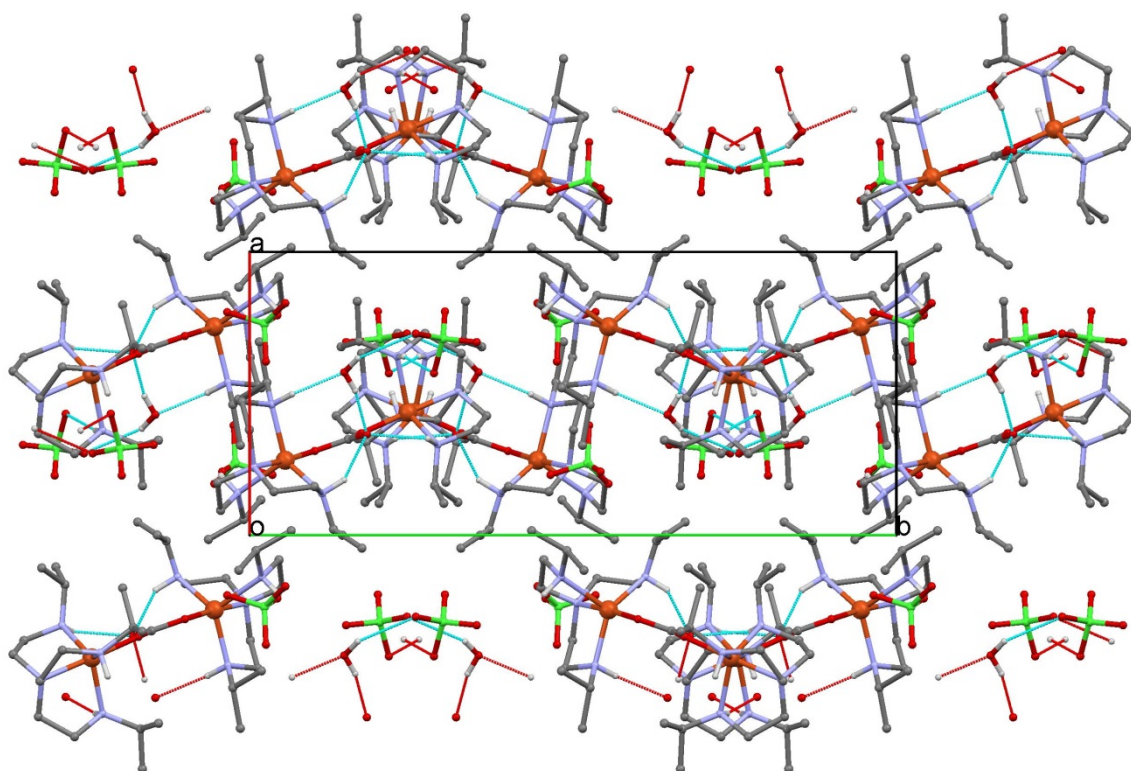

**Fig. S2.** Packing plot of 2. Hydrogen bonds are indicated as broken lines.
